# Supplementary material
Source: Springer Nature journal article supplement (https://www.springermedizin.de/resource/supplementary/12871_2014_310_MOESM3_ESM.pdf/9429328)

## Change from preoperative value to 30 minutes after onset

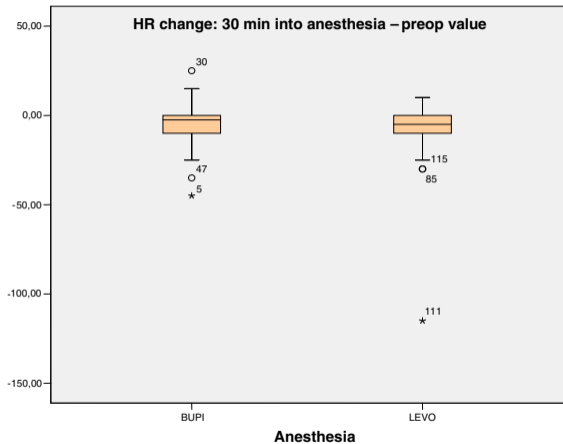

## Change from 30 minutes after onset to end of anesthesia

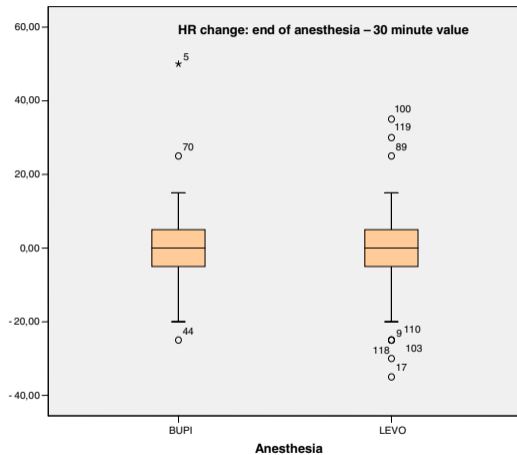

Supplement: MOESM3 [file 9429328]
